# Supplementary material
Source: PubMed Central journal article supplement (PMC3125478)
Supplement: NIHMS293731-supplement-1.pdf [file NIHMS293731-supplement-1.pdf]

SUPPLEMENTAL MATERIAL

**Supplemental Table: Types and frequencies of infections in the 90 days preceding stroke**

| General infection class      | ICD-9 code(s)    | Frequency* (% of infections) during case period | Frequency* (% of infections) during control period** |
|------------------------------|------------------|-------------------------------------------------|------------------------------------------------------|
| Respiratory                  | 460-466, 480-487 | 15 (42%)                                        | 7 (33%)                                              |
| Assorted                     | 001-134          | 10 (28%)                                        | 6 (29%)                                              |
| Urinary tract                | 599.0, 595, 590  | 7 (19%)                                         | 8 (38%)                                              |
| Skin and subcutaneous tissue | 680-686          | 2 (6%)                                          | 0                                                    |
| Bacteremia                   | 790.7            | 1 (3%)                                          | 0                                                    |
| Osteomyelitis                | 730.0-730.2      | 1 (3%)                                          | 0                                                    |

\*Individuals may have been hospitalized more than once or had multiple ICD9 codes at each hospitalization.

\*\*Data are shown for case-crossover analyses only. Ninety day control periods are 1 and 2 years before the corresponding case period.
